# Supplementary material for: Smoking as an Independent Risk Factor for Hepatocellular Carcinoma Due to the α7-Nachr Modulating the JAK2/STAT3 Signaling Axis
Source: PubMed Central journal article supplement (PMC6780871; doi:10.3390/jcm8091391), 2019-09-05
Supplement: jcm-08-01391-s001.pdf [file jcm-08-01391-s001.pdf]

## SUPPLEMENTARY INFORMATION

### Smoking as an independent risk factor for hepatocellular carcinoma due to the $\alpha 7$ -nAChR modulating the JAK2/STAT3 signaling axis

Ching-Li Li<sup>1,2</sup>, Yen-Kuang Lin<sup>3</sup>, Hsin-An Chen<sup>4,5</sup>, Chien-Yu Huang<sup>4</sup>, Ming-Te Huang<sup>1,4,5\*</sup>, Yu-Jia Chang<sup>1,6\*</sup>

<sup>1</sup>Graduate Institute of Clinical Medicine, College of Medicine, Taipei Medical University, Taipei, Taiwan, ROC

<sup>2</sup>Department of Surgery, Sijhih Cathay General Hospital, New Taipei City, Taiwan, ROC

<sup>3</sup>Biostatistics Center, Taipei Medical University, Taipei, Taiwan, ROC

<sup>4</sup>Department of Surgery, Taipei Medical University, Shuang Ho Hospital, New Taipei City, Taiwan, ROC

<sup>5</sup>Division of General Surgery, Department of Surgery, School of Medicine, College of Medicine, Taipei Medical University, Taiwan, ROC

<sup>6</sup>International PhD Program in Medicine, Taipei Medical University, Taipei, Taiwan, ROC

#### \* Corresponding author

Ming-Te Huang. No. 291, Zhongzheng Rd., Zhonghe District, New Taipei City 235, Taiwan (R.O.C); Tel/Fax: 886-2-22490088 Ext 8123. E-mail: [15729@s.tmu.edu.tw](mailto:15729@s.tmu.edu.tw)

Yu-Jia Chang. 250 Wu-Xing Street, Taipei City 11031, Taiwan; Tel/Fax: +886-2-27361661 ext. 3027. E-mail: [r5424012@tmu.edu.tw](mailto:r5424012@tmu.edu.tw)

**Working title:** Targeting the  $\alpha 7$ -nAChR inhibits liver cancer poor prognosis

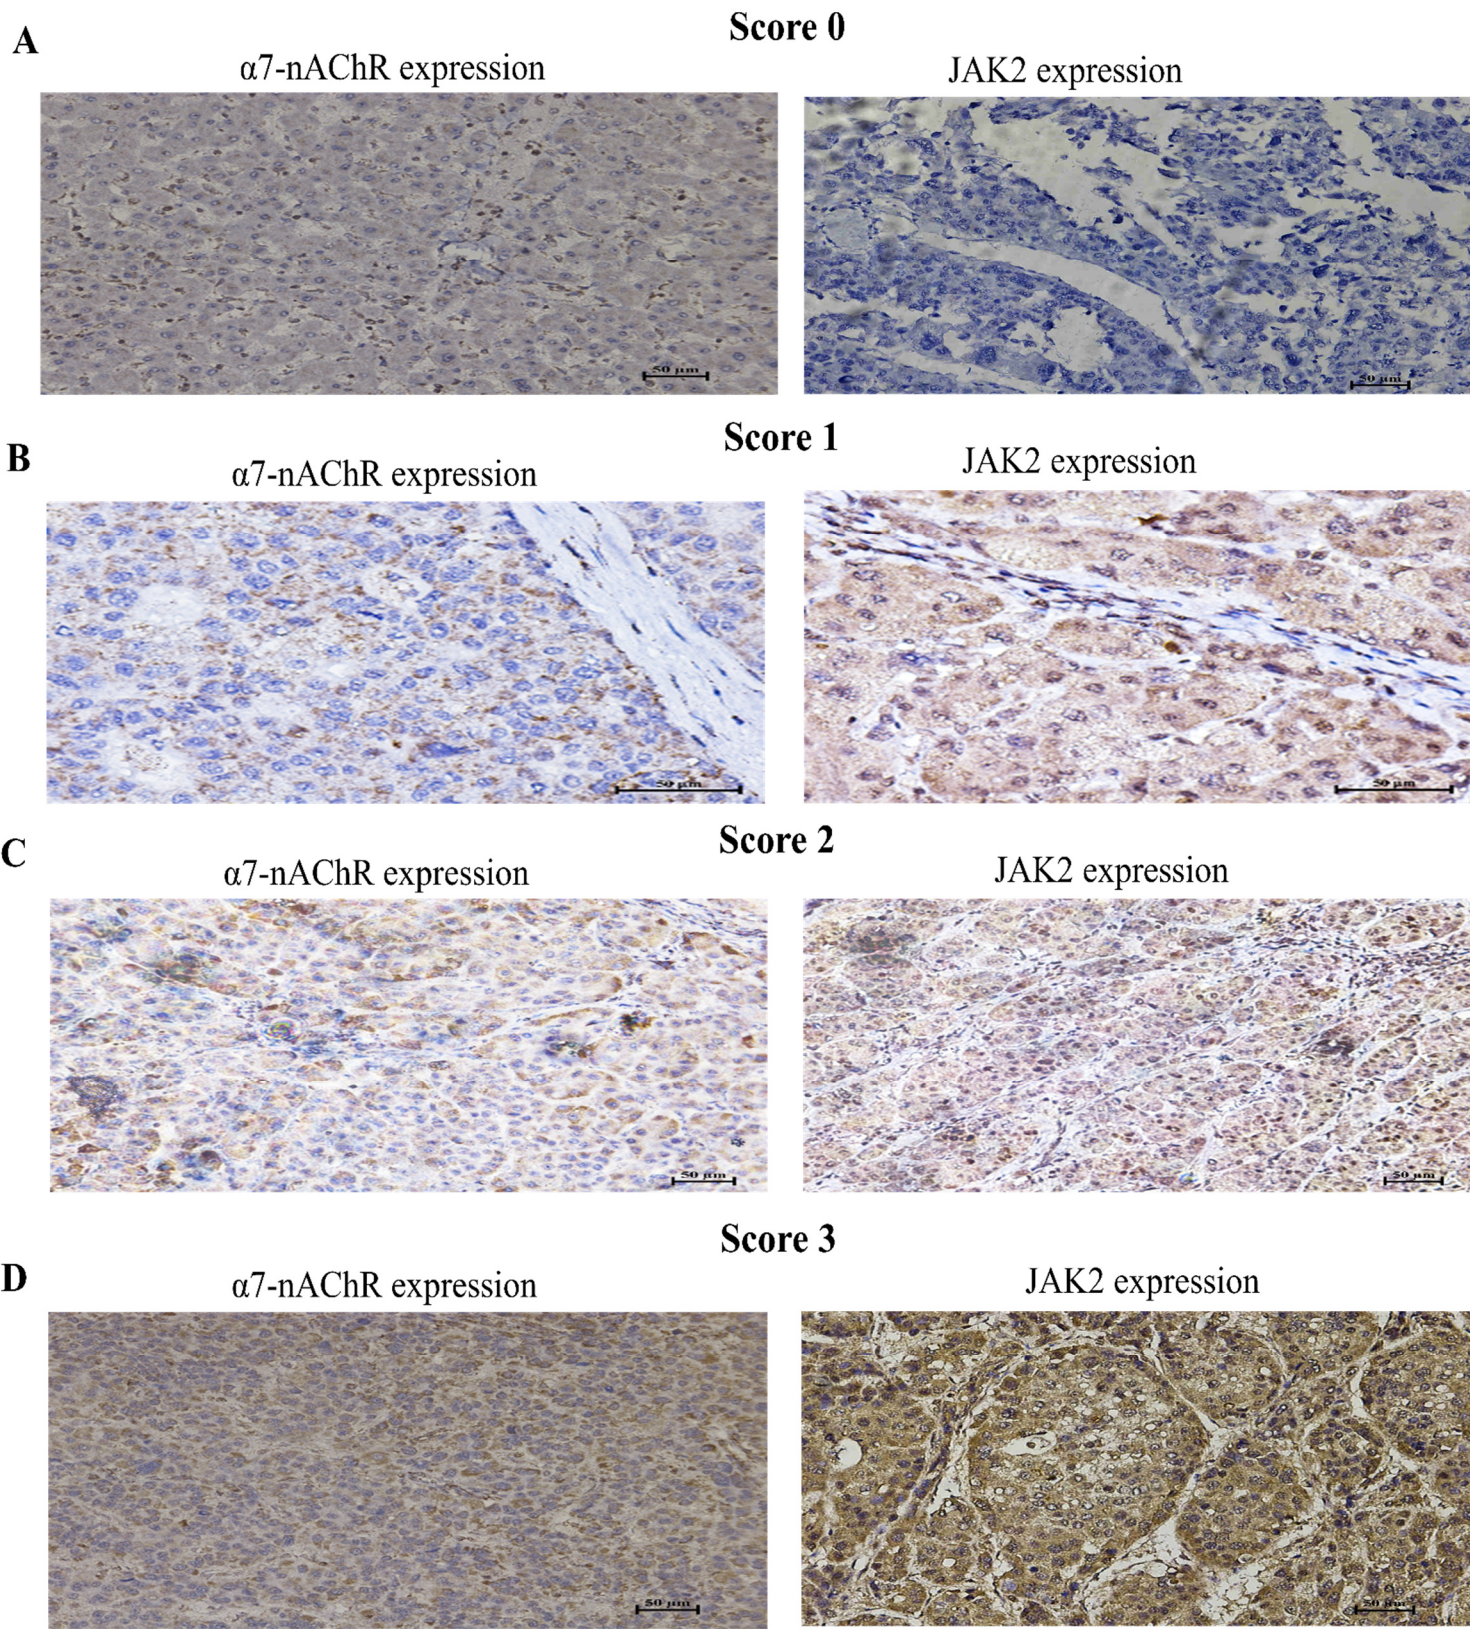

**Supplementary Figure S1**



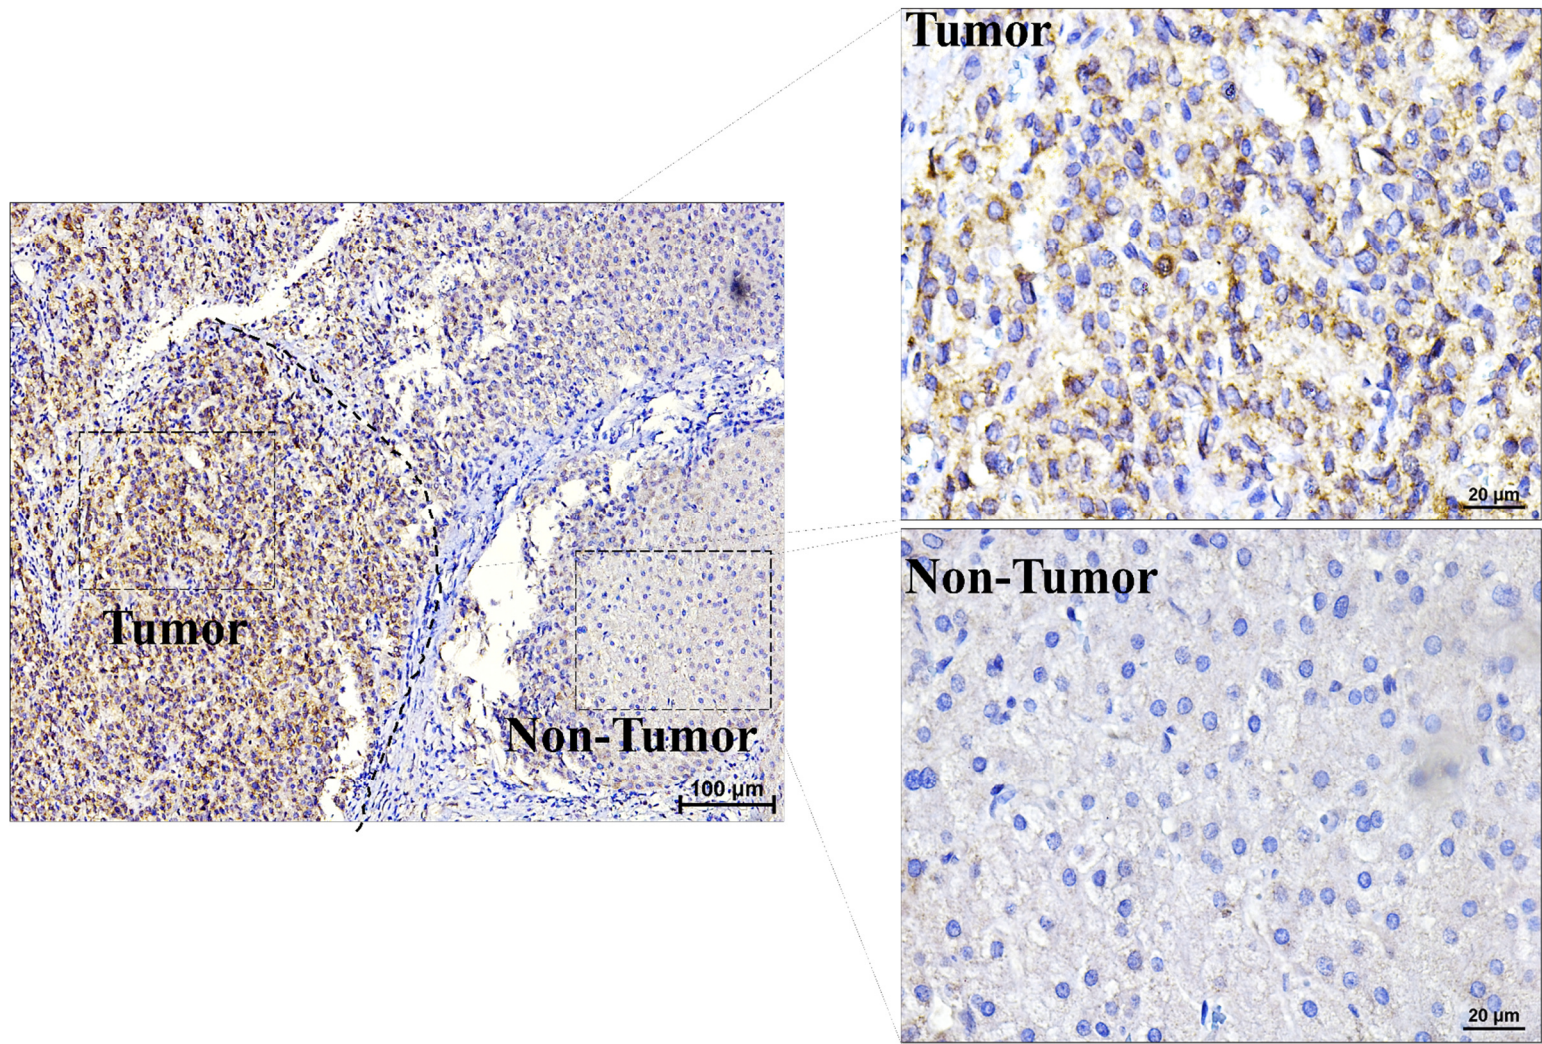

**Supplementary Figure S2**
